# Supplementary material for: Glioblastoma cellular cross-talk converges on NF-κB to attenuate EGFR inhibitor sensitivity
Source: PubMed Central journal article supplement — Genes Dev. 2017 Jun 15;31(12):1212–27. doi: 10.1101/gad.300079.117 (PMC5558924; doi:10.1101/gad.300079.117), 2017-06-15

**A**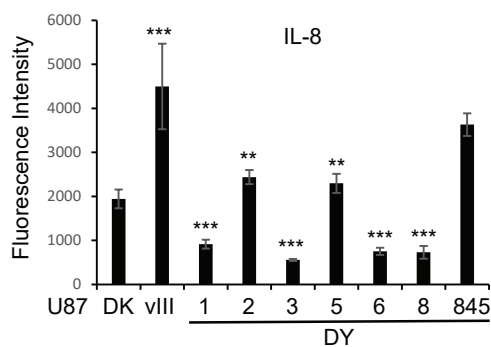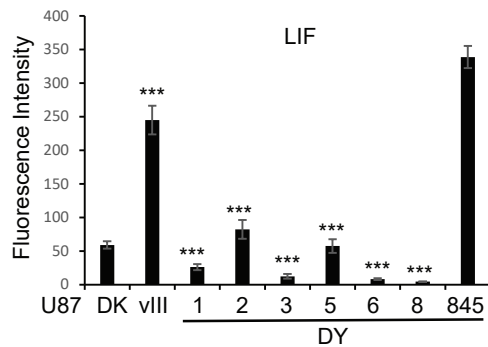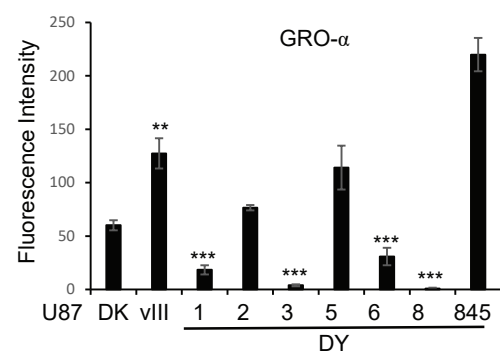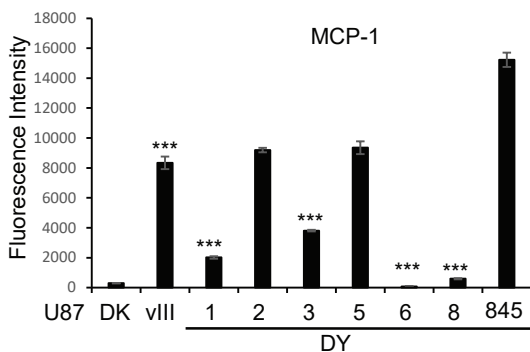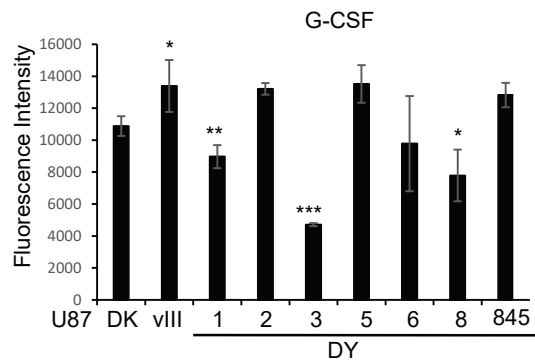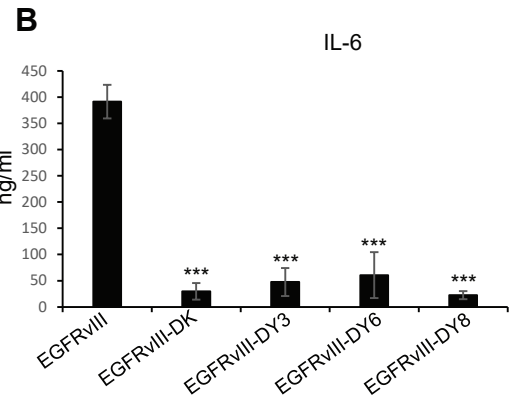**D**

|                                         | EGFRvIII | EGFRvIII-DK | EGFRvIII-DY3 | EGFRvIII-DY6 | EGFRvIII-DY8 |
|-----------------------------------------|----------|-------------|--------------|--------------|--------------|
| AKT (Ser473)                            | 100.00   | 20.45       | 39.66        | 57.82        | 39.98        |
| p-c-Jun (Ser63)                         | 100.00   | 67.47       | 86.12        | 186.52       | 140.07       |
| p-EGFR (Tyr1173)                        | 100.00   | 45.16       | 30.87        | 61.65        | 45.34        |
| p-GSK-3ab (Ser21/Ser9)                  | 100.00   | 119.42      | 146.26       | 81.82        | 89.08        |
| p-IRS-1 (Ser636/Ser639)                 | 100.00   | 70.96       | 107.62       | 136.94       | 90.76        |
| p-Lyn (Tyr507)                          | 100.00   | 55.49       | 85.89        | 165.91       | 92.64        |
| p-mTOR (Ser2448)                        | 100.00   | 78.37       | 83.15        | 108.54       | 90.27        |
| p-p70 S6 Kinase (Thr421/Ser424)         | 100.00   | 73.54       | 75.38        | 136.47       | 104.10       |
| p-PDGFR-b (Tyr751)                      | 100.00   | 58.67       | 79.15        | 157.43       | 84.81        |
| p-PTEN (Ser380)                         | 100.00   | 84.57       | 108.94       | 123.62       | 121.16       |
| p-S6 (Ser235/Ser236)                    | 100.00   | 97.91       | 130.68       | 136.14       | 114.43       |
| p-STAT3 (Tyr705)                        | 100.00   | 80.01       | 92.32        | 112.60       | 122.47       |
| p-Syk (Tyr352)                          | 100.00   | 87.23       | 86.87        | 113.86       | 126.05       |
| p-VEGFR-2 (Tyr1175)                     | 100.00   | 78.26       | 86.27        | 114.59       | 126.54       |
| p-ZAP-70 (Tyr319)                       | 100.00   | 84.34       | 79.50        | 139.82       | 98.58        |
| b-Actin                                 | 100.00   | 100.00      | 100.00       | 100.00       | 100.00       |
| p-ATF-2 (thr71)                         | 100.00   | 155.30      | 195.22       | 266.96       | 231.75       |
| p-ERK1/2 (Thr202/Tyr204, Thr185/Tyr187) | 100.00   | 133.02      | 179.83       | 144.69       | 152.14       |
| p-HSP27 (Ser78)                         | 100.00   | 108.68      | 107.13       | 91.04        | 126.64       |
| p-JNK (thr183/Tyr185)                   | 100.00   | 109.42      | 115.75       | 101.28       | 82.08        |
| p-MEK1 (Ser217/Ser221)                  | 100.00   | 99.04       | 117.45       | 110.66       | 145.28       |
| p-p38 MAPK (thr180/Tyr182)              | 100.00   | 118.56      | 116.91       | 110.53       | 109.33       |
| p-p53 (Ser15)                           | 100.00   | 135.25      | 116.94       | 128.63       | 97.08        |
| p-p90 RSK (Ser380)                      | 100.00   | 180.78      | 283.41       | 114.29       | 158.48       |
| p-PDGFRa (Tyr754)                       | 100.00   | 101.53      | 94.80        | 109.89       | 102.88       |
| p-PI3k p85 (Tyr458)                     | 100.00   | 135.62      | 121.95       | 113.24       | 101.24       |
| p-SMAD2 (Ser465/Ser467)                 | 100.00   | 104.17      | 134.87       | 117.35       | 127.55       |
| p-Src (Tyr416)                          | 100.00   | 105.90      | 104.10       | 86.75        | 117.94       |
| p-STAT3 (Ser727)                        | 100.00   | 100.46      | 115.36       | 157.42       | 82.10        |
| p-AKT (thr308)                          | 100.00   | 63.70       | 93.22        | 84.26        | 84.86        |
| p-HER-2 (Tyr1248)                       | 100.00   | 108.50      | 92.92        | 92.92        | 81.55        |
| p-IR-b (Tyr1146)                        | 100.00   | 48.31       | 69.20        | 75.72        | 51.69        |
| p-p70 S6 Kinase (Thr389)                | 100.00   | 87.22       | 78.14        | 81.52        | 107.02       |
| p-Btk (Tyr223)                          | 100.00   | 94.21       | 118.58       | 92.11        | 111.84       |
| p-c-Abl (Tyr245)                        | 100.00   | 130.05      | 110.26       | 105.25       | 124.58       |
| p-IGF-R1 (Tyr1131)                      | 100.00   | 136.22      | 157.25       | 122.94       | 159.49       |
| p-STAT1 (Tyr701)                        | 100.00   | 80.09       | 213.80       | 90.74        | 112.18       |

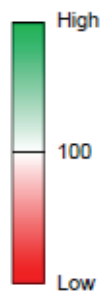**C**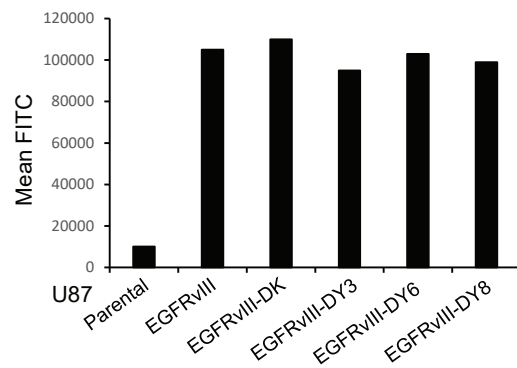

Supplement: supp_gad.300079.117_Supplemental_FigS13.pdf [file supp_gad.300079.117_Supplemental_FigS13.pdf]
