# Supplementary material for: Glioblastoma cellular cross-talk converges on NF-κB to attenuate EGFR inhibitor sensitivity
Source: PubMed Central journal article supplement — Genes Dev. 2017 Jun 15;31(12):1212–27. doi: 10.1101/gad.300079.117 (PMC5558924; doi:10.1101/gad.300079.117), 2017-06-15

| gene set                                    | NOM p-val | FDR q-val |
|---------------------------------------------|-----------|-----------|
| REACTOME_CELL_CYCLE_MITOTIC                 | 0         | 0         |
| REACTOME_DNA_REPLICATION                    | 0         | 0         |
| REGULATION_OF_PROGRAMMED_CELL_DEATH         | 0         | 0.317808  |
| REGULATION_OF_APOPTOSIS                     | 0.111111  | 0.387733  |
| REACTOME_ACTIVATION_OF_NF_KAPPAB_IN_B_CELLS | 0         | 0         |

**B**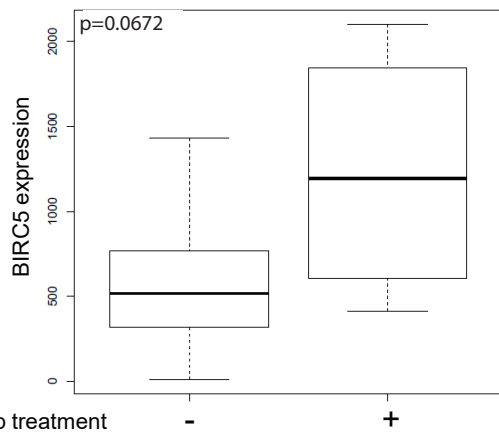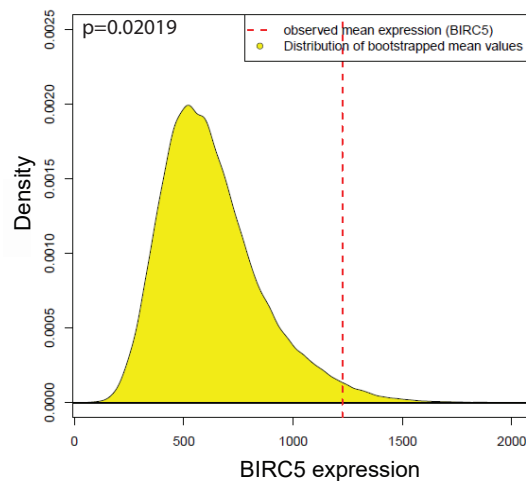**C**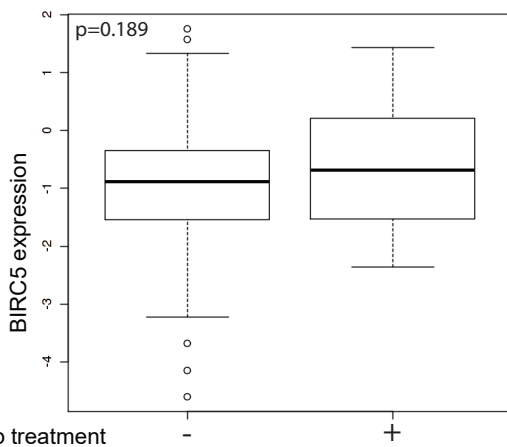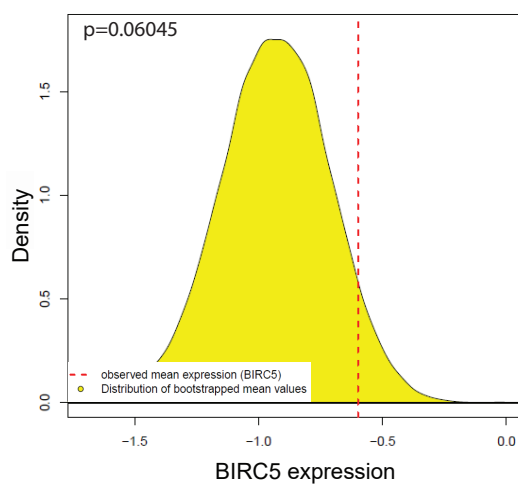

Supplement: supp_gad.300079.117_Supplemental_FigS15.pdf [file supp_gad.300079.117_Supplemental_FigS15.pdf]
