# Supplementary figures and images for: Glioblastoma cellular cross-talk converges on NF-κB to attenuate EGFR inhibitor sensitivity
Source: PubMed Central journal article supplement — Genes Dev. 2017 Jun 15;31(12):1212–27. doi: 10.1101/gad.300079.117 (PMC5558924; doi:10.1101/gad.300079.117), 2017-06-15

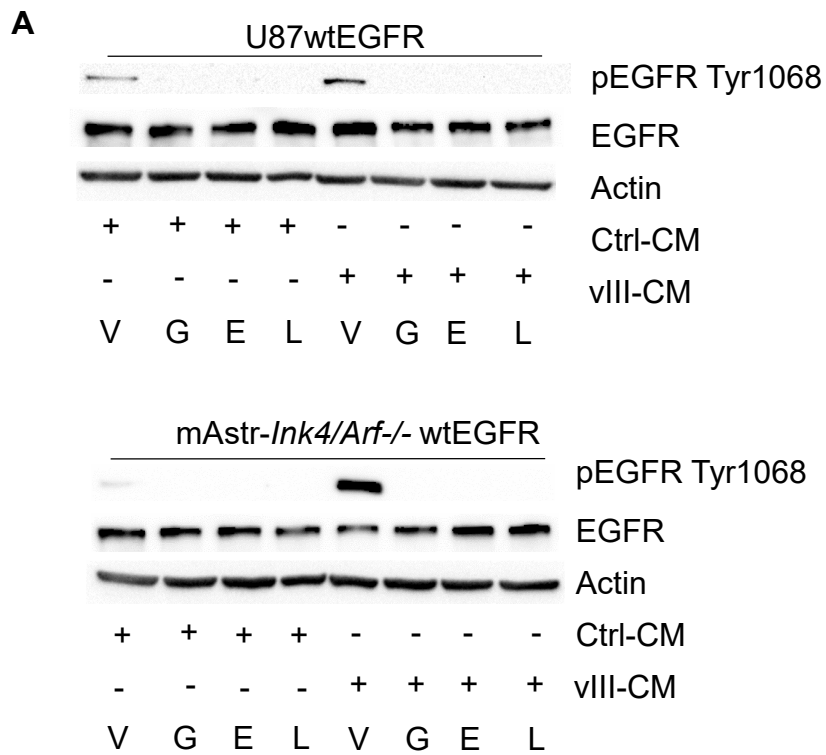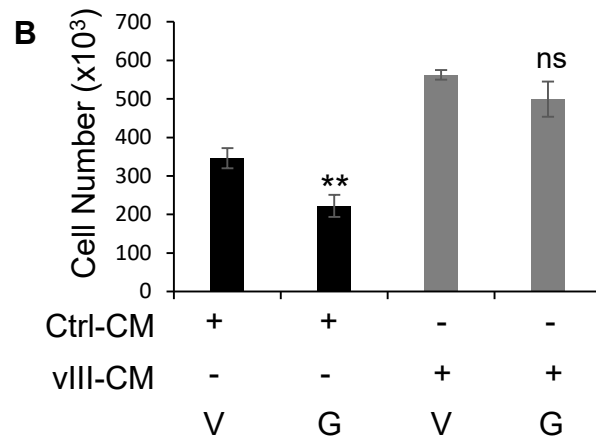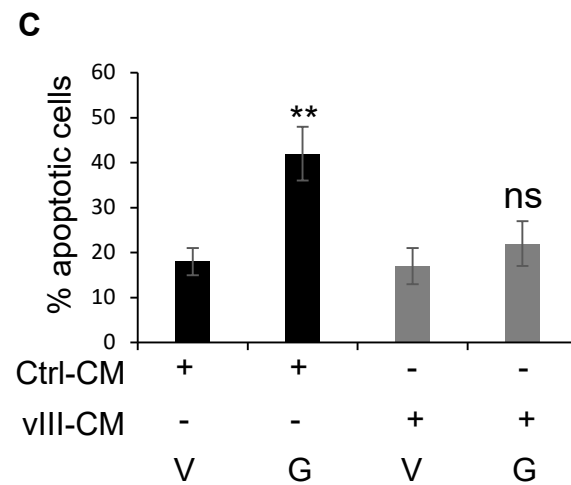

Supplement: supp_gad.300079.117_Supplemental_FigS1.pdf [file supp_gad.300079.117_Supplemental_FigS1.pdf]

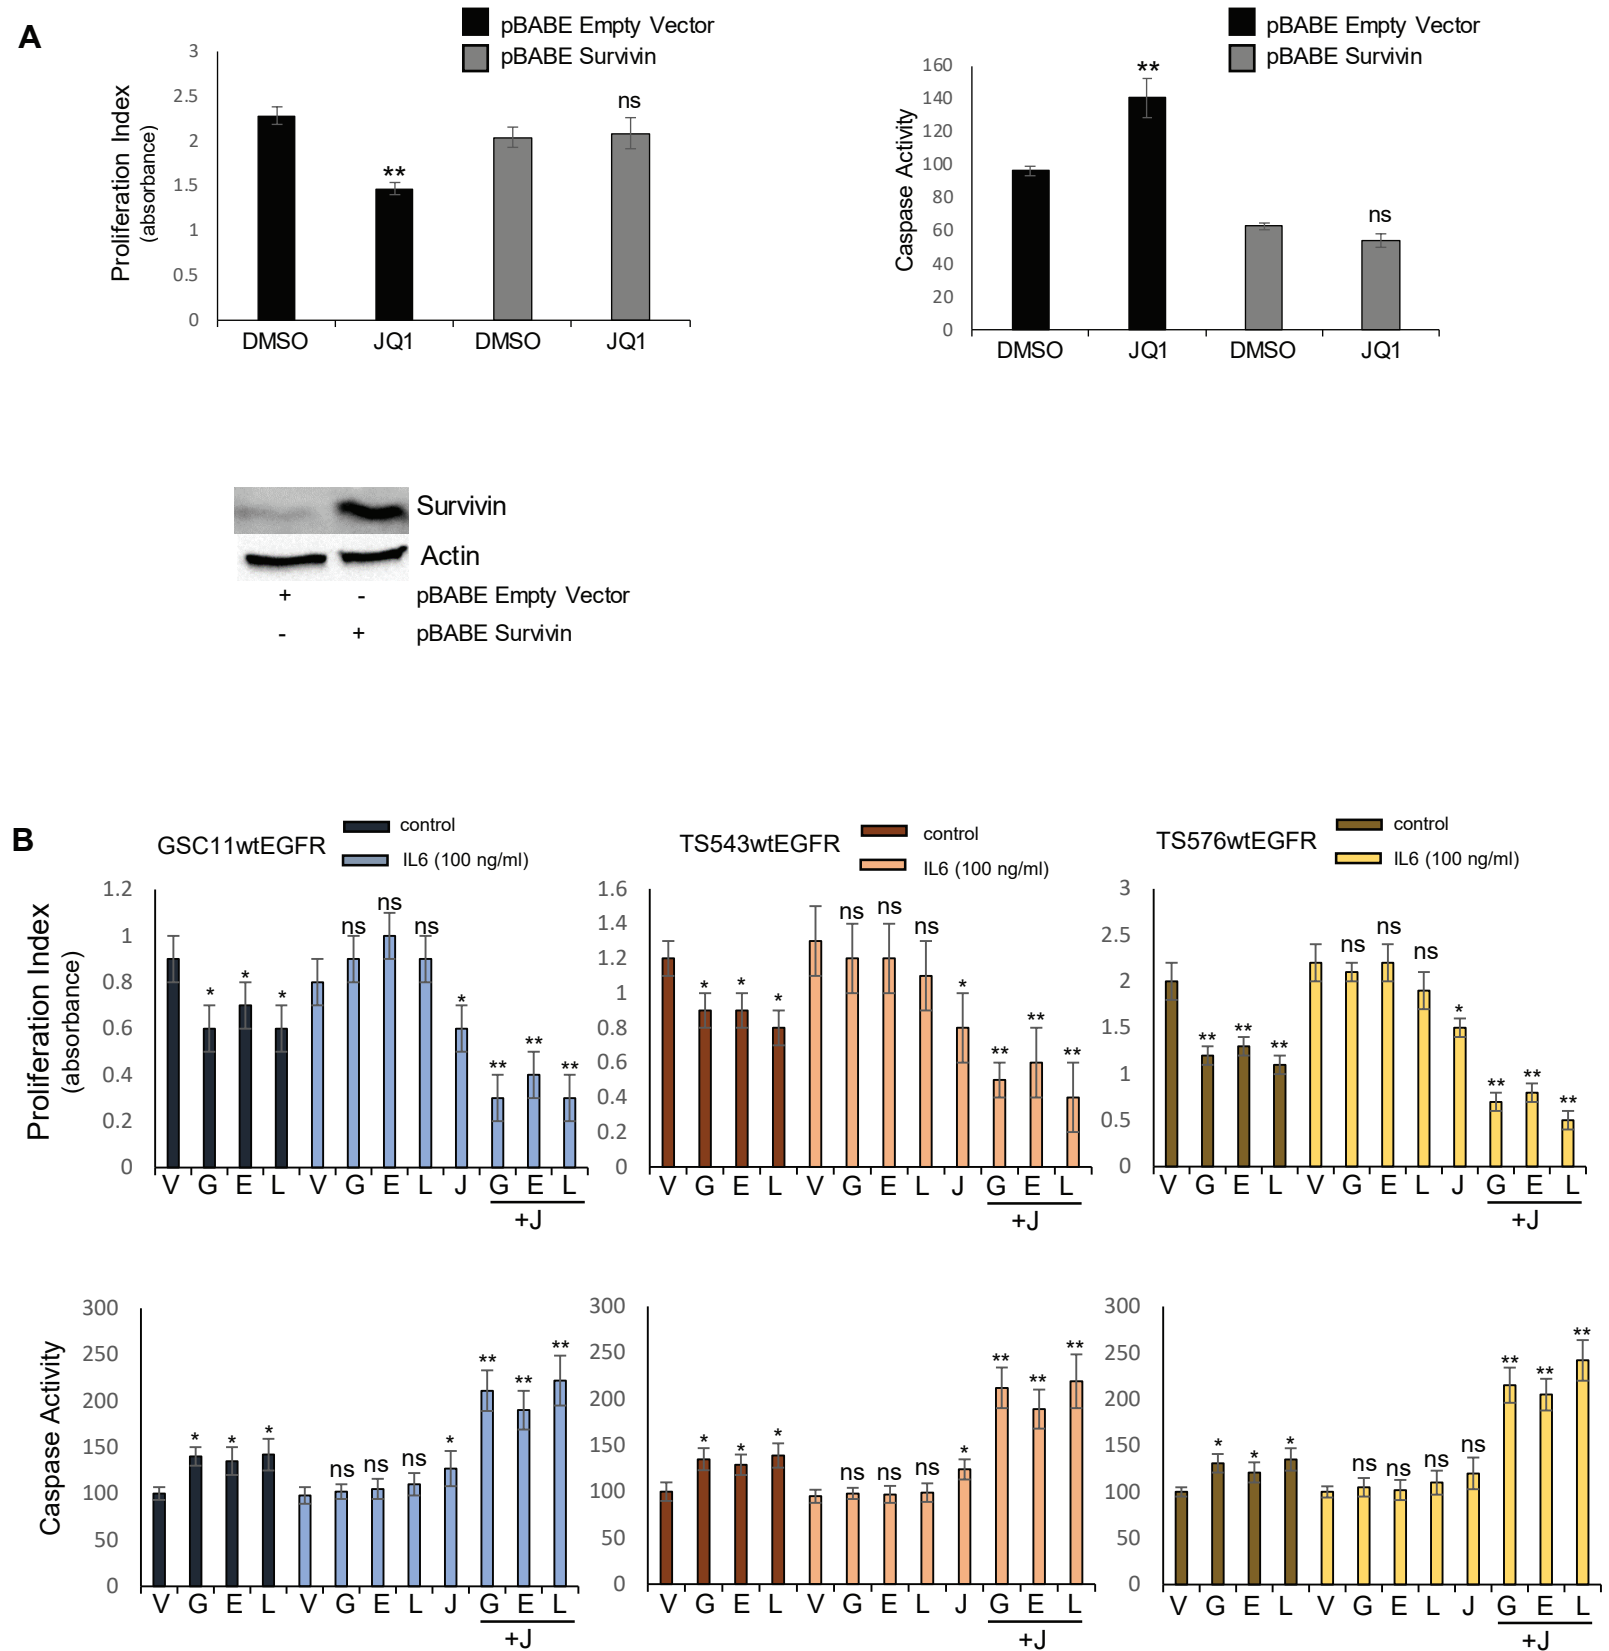

Supplement: supp_gad.300079.117_Supplemental_FigS10.pdf [file supp_gad.300079.117_Supplemental_FigS10.pdf]

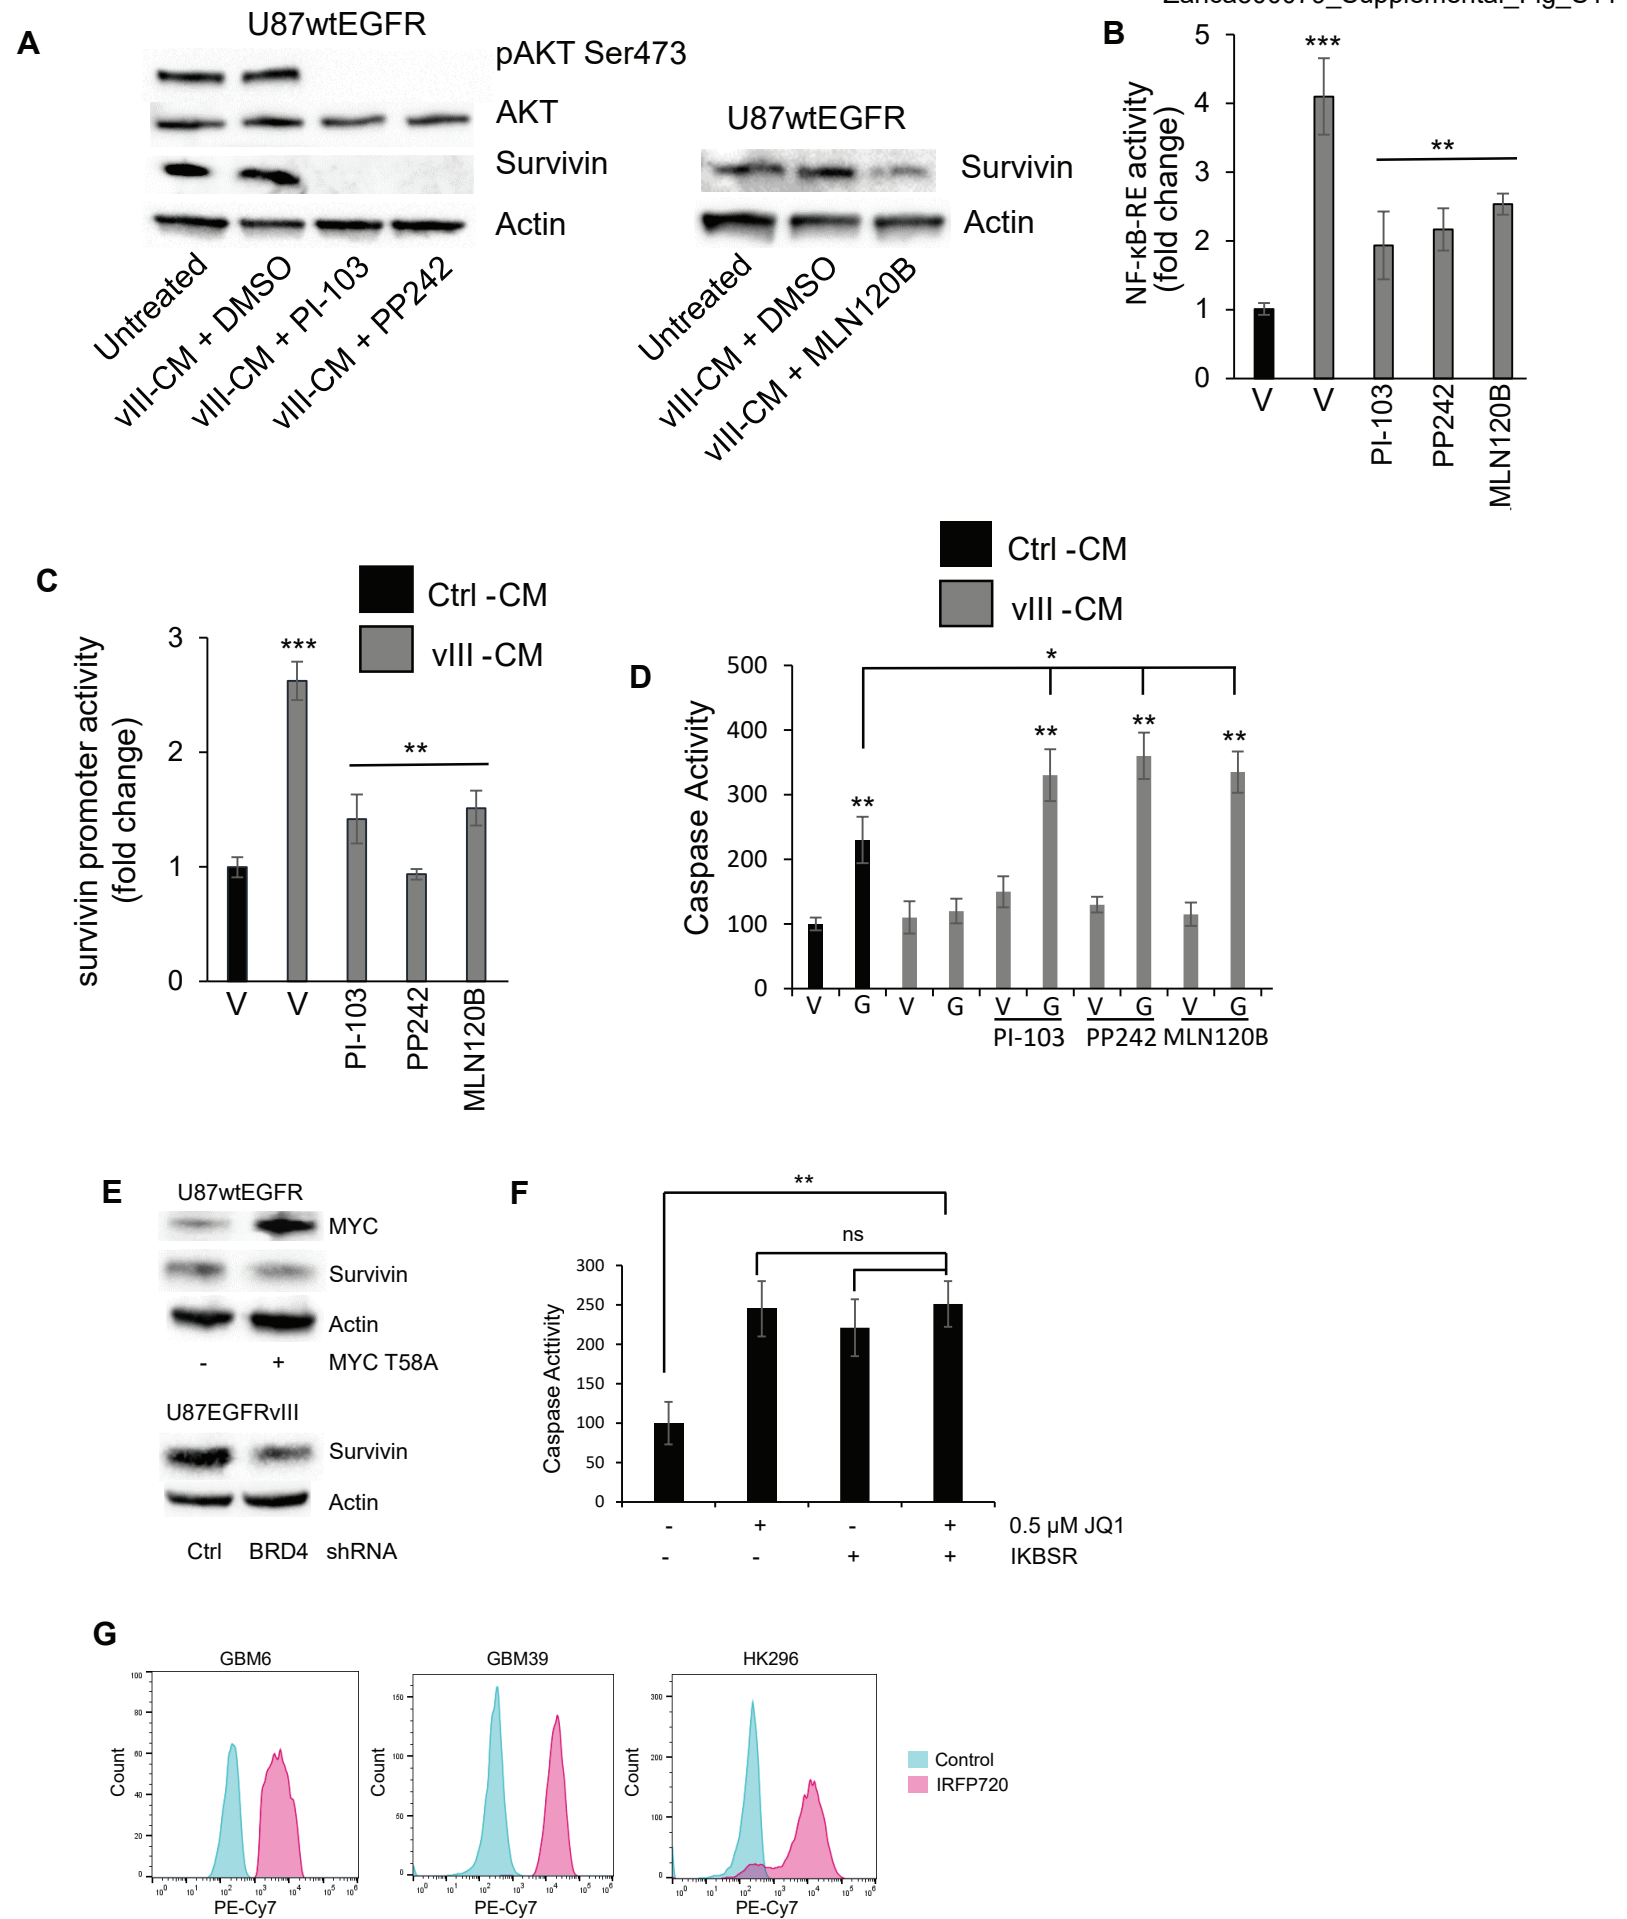

Supplement: supp_gad.300079.117_Supplemental_FigS11.pdf [file supp_gad.300079.117_Supplemental_FigS11.pdf]

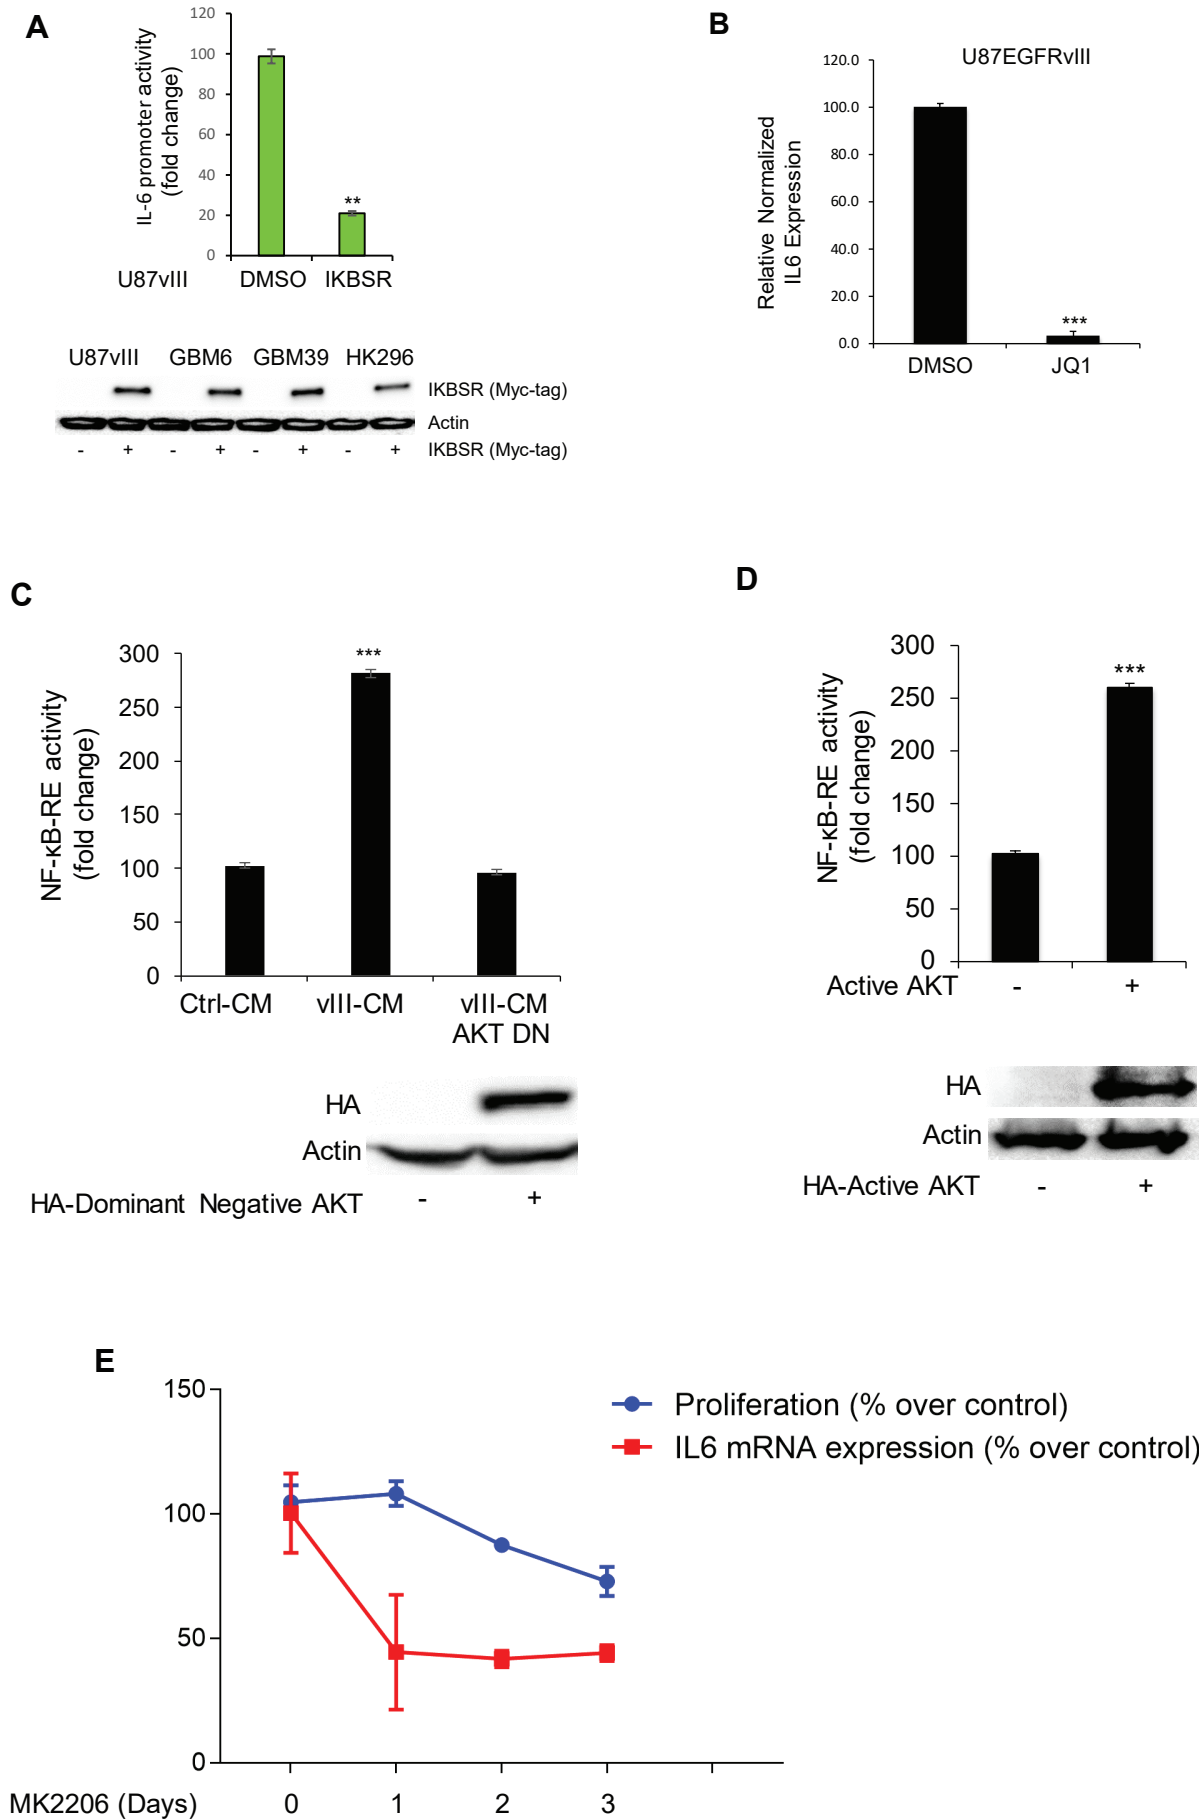

Supplement: supp_gad.300079.117_Supplemental_FigS14.pdf [file supp_gad.300079.117_Supplemental_FigS14.pdf]

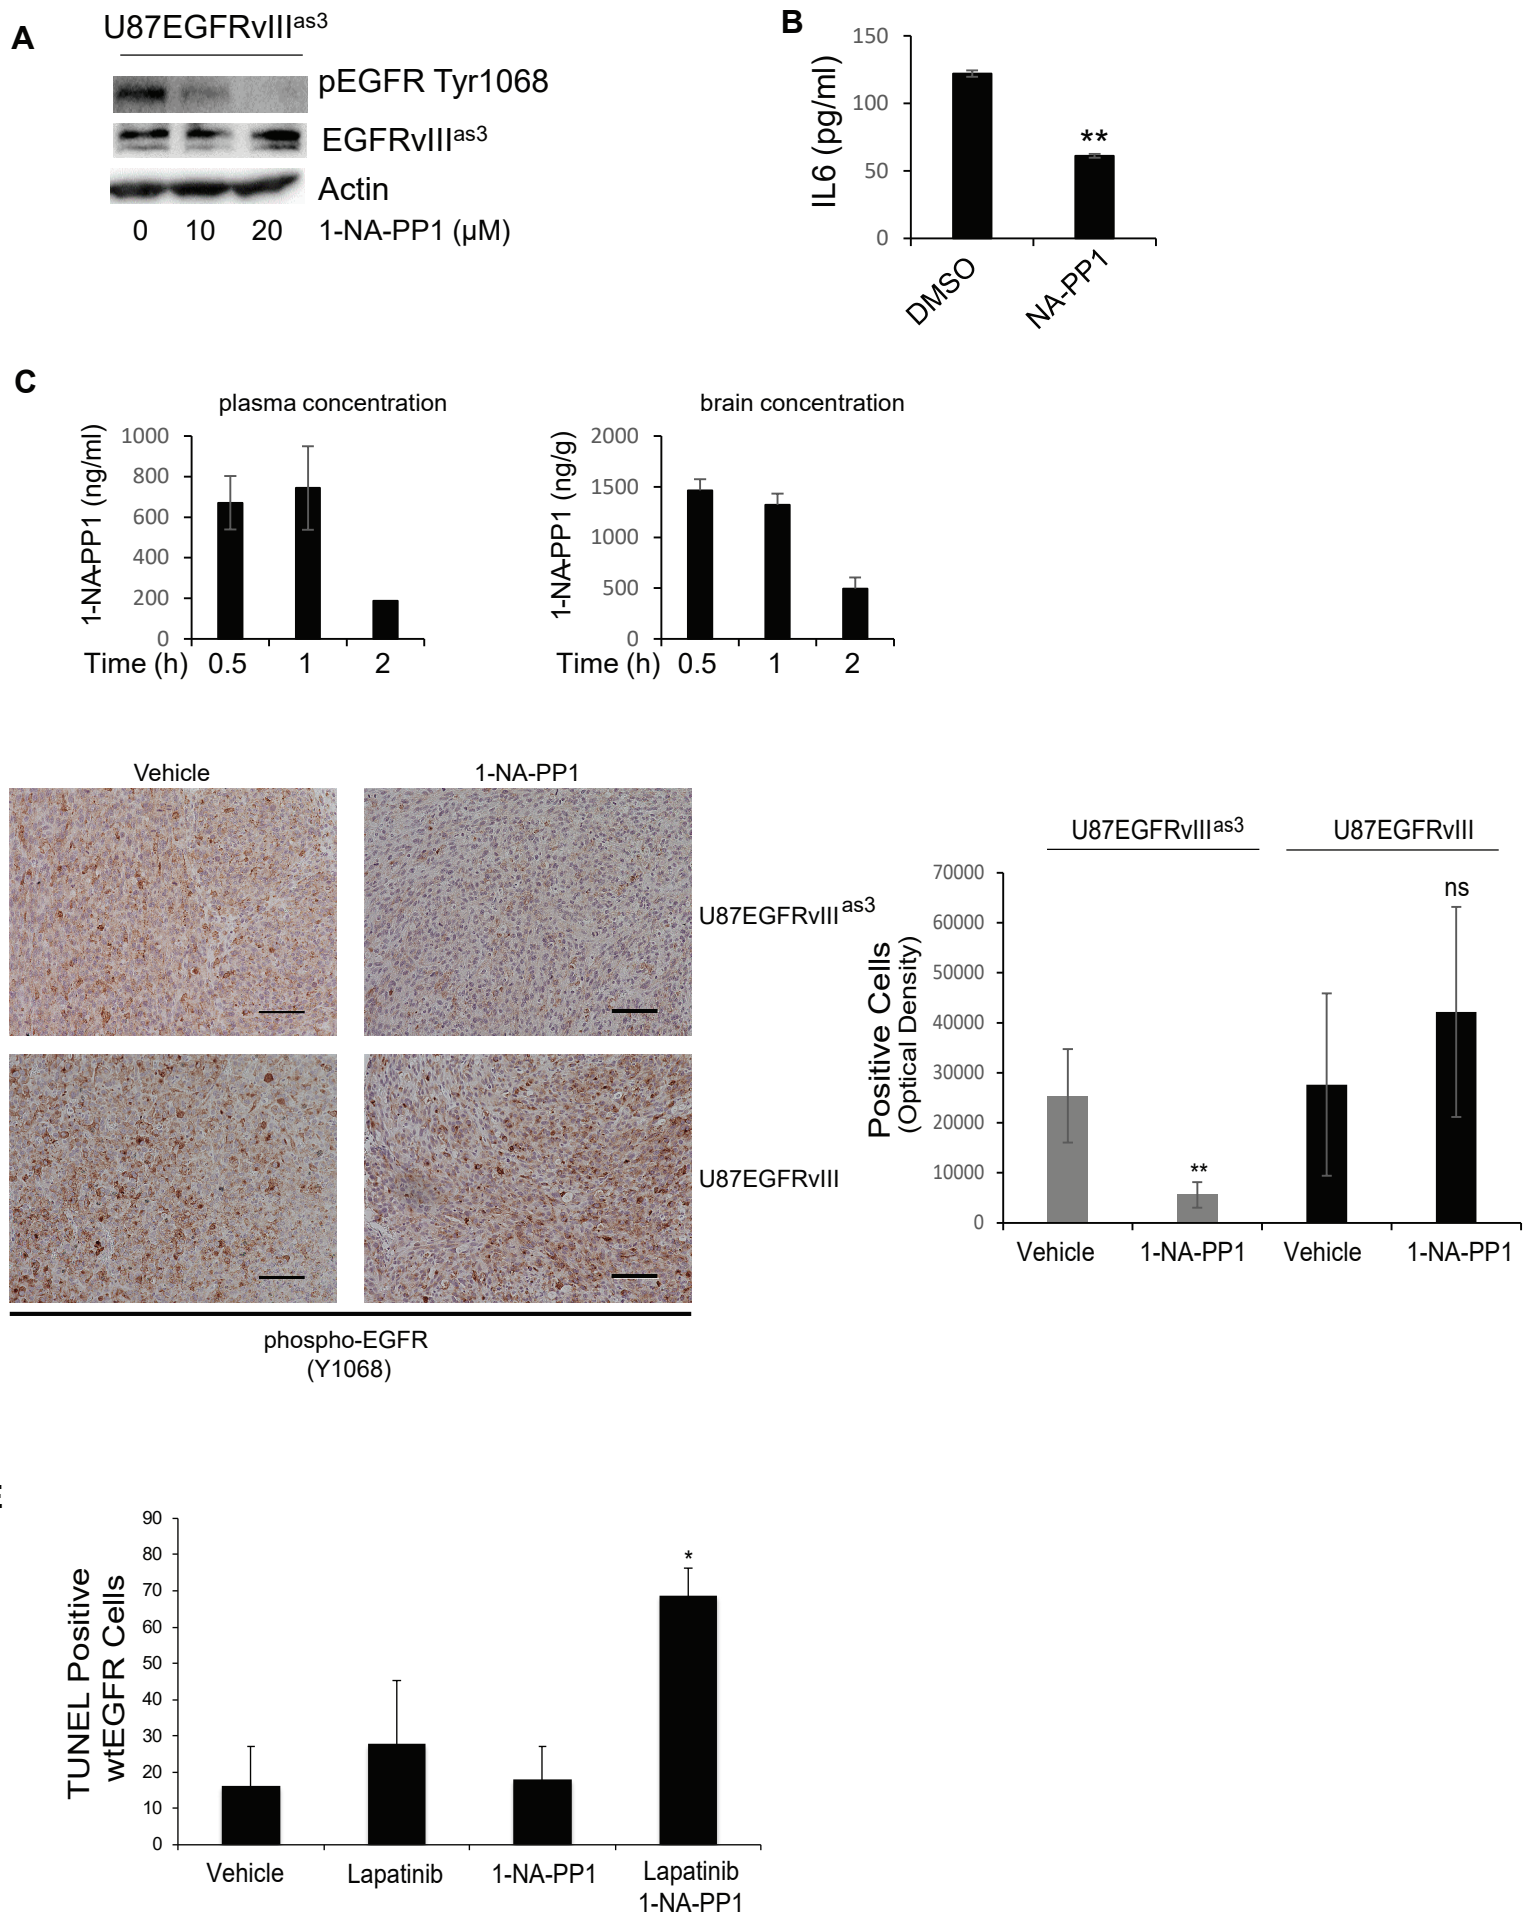

Supplement: supp_gad.300079.117_Supplemental_FigS2.pdf [file supp_gad.300079.117_Supplemental_FigS2.pdf]

**A**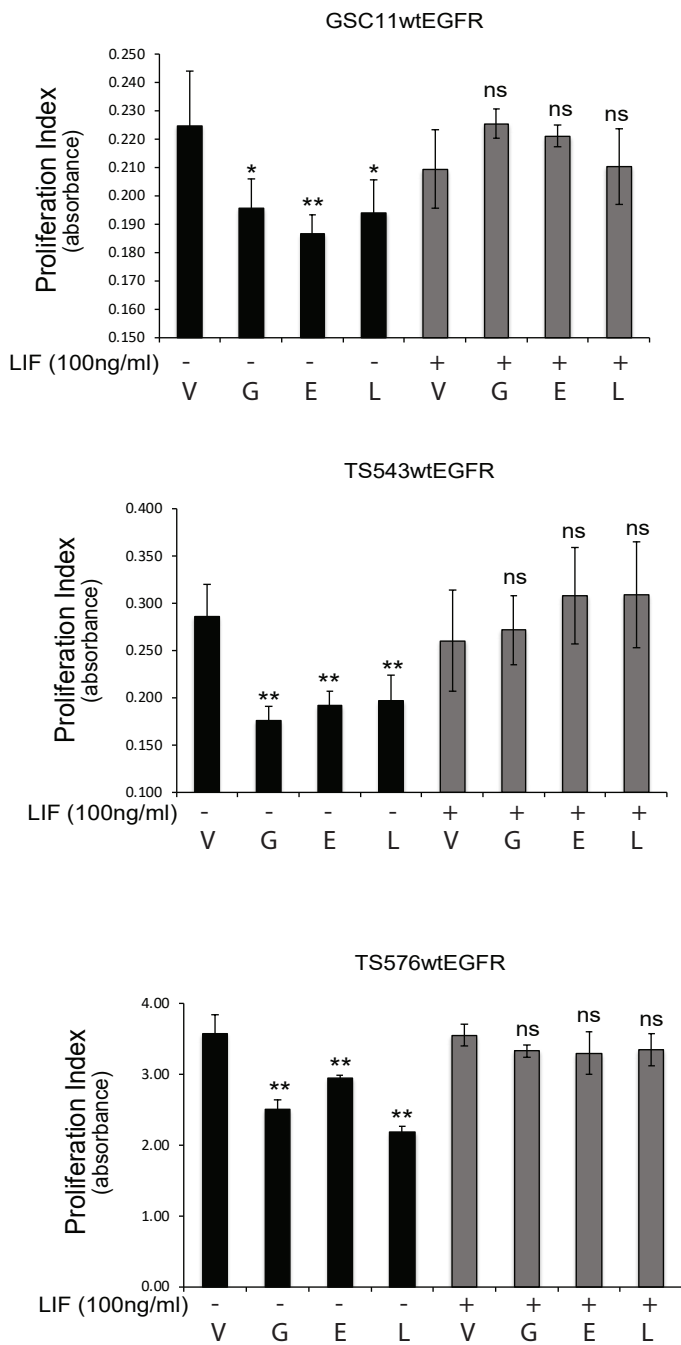**B**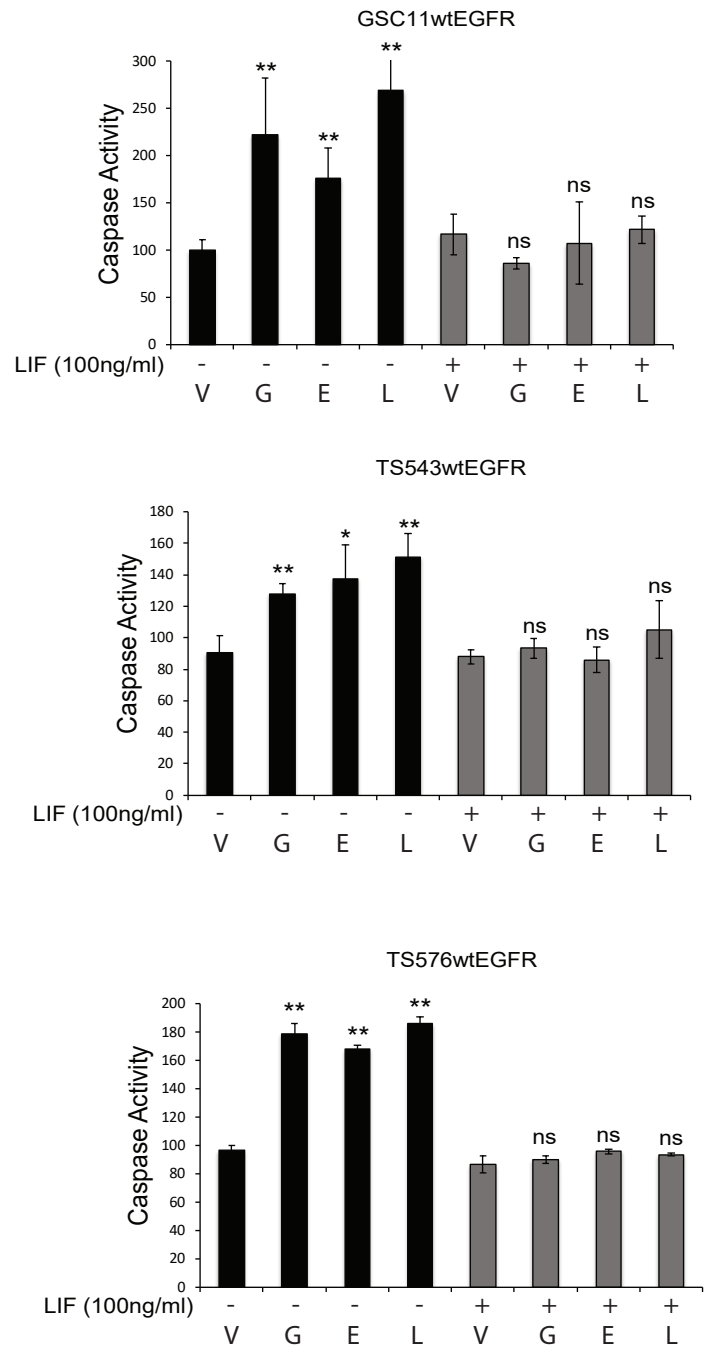

Supplement: supp_gad.300079.117_Supplemental_FigS4.pdf [file supp_gad.300079.117_Supplemental_FigS4.pdf]

**A**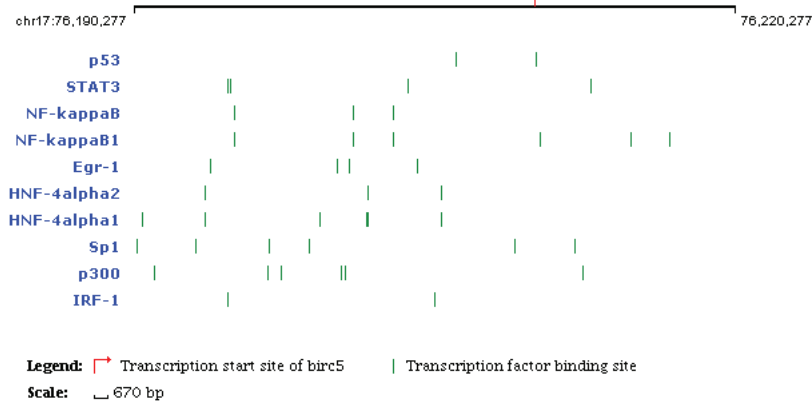**B**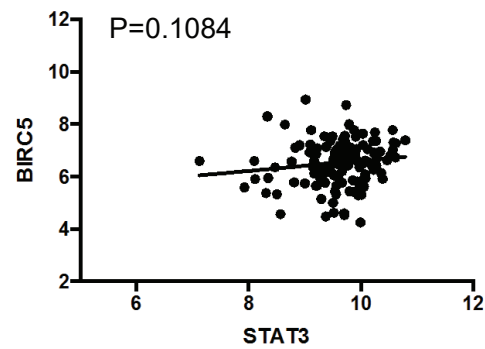**C**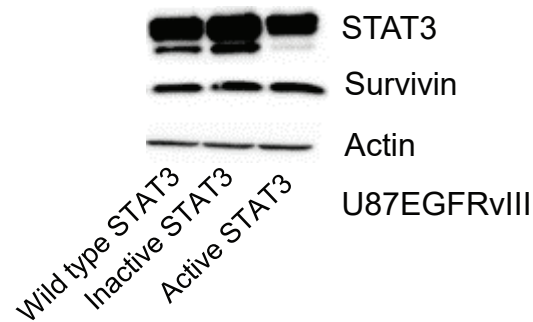**D**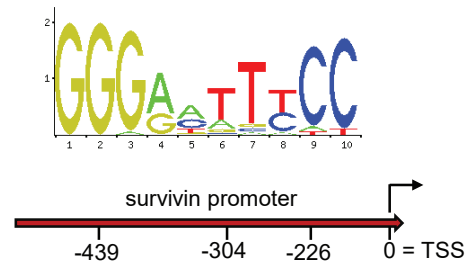**E**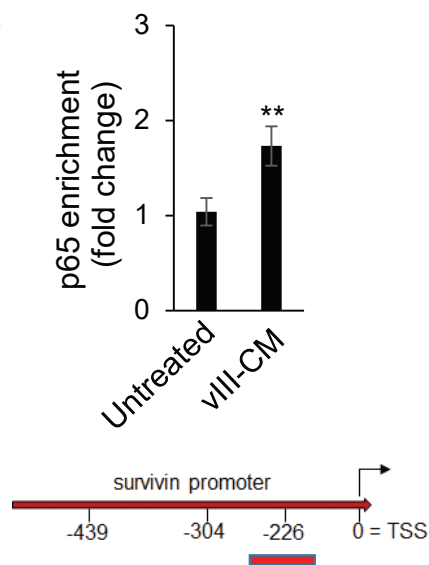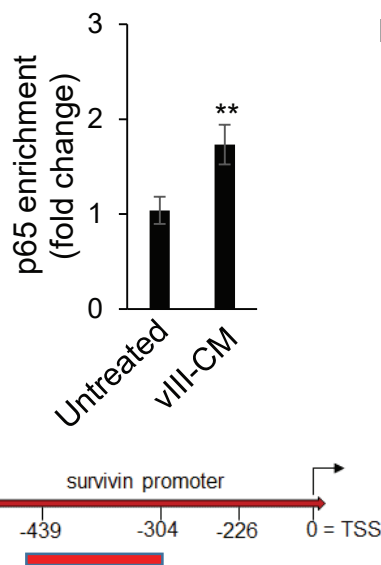**F**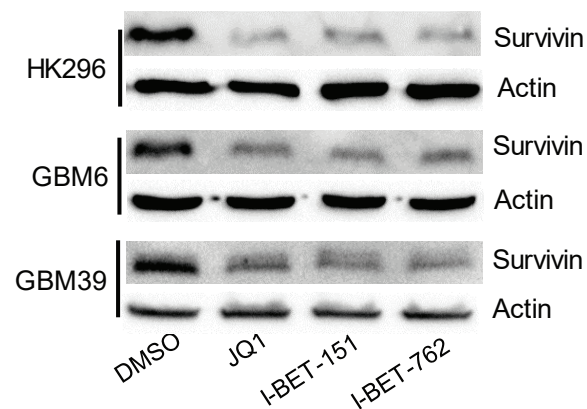**G**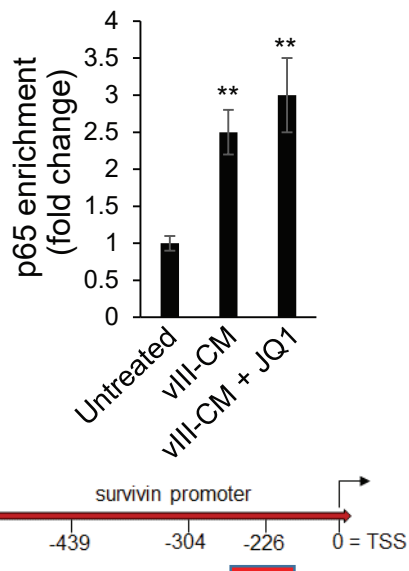**H**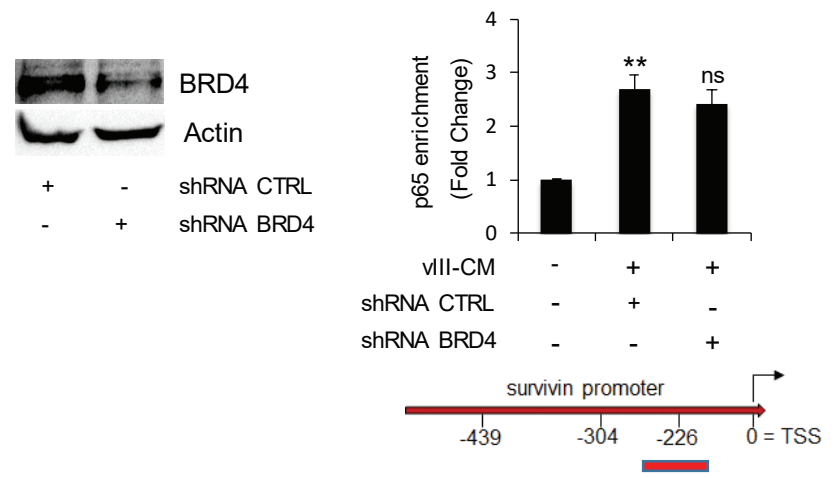

Supplement: supp_gad.300079.117_Supplemental_FigS8.pdf [file supp_gad.300079.117_Supplemental_FigS8.pdf]
